# Supplementary material
Source: PubMed Central journal article supplement (PMC3213278)

# Supplementary Figure 1

**A**

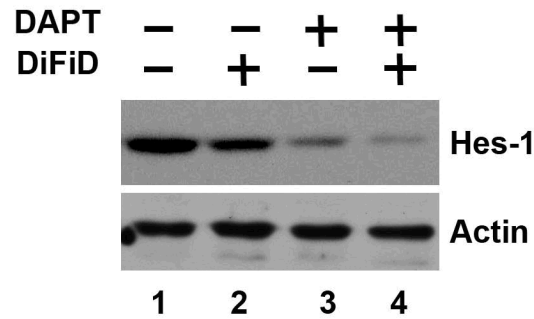

**B**

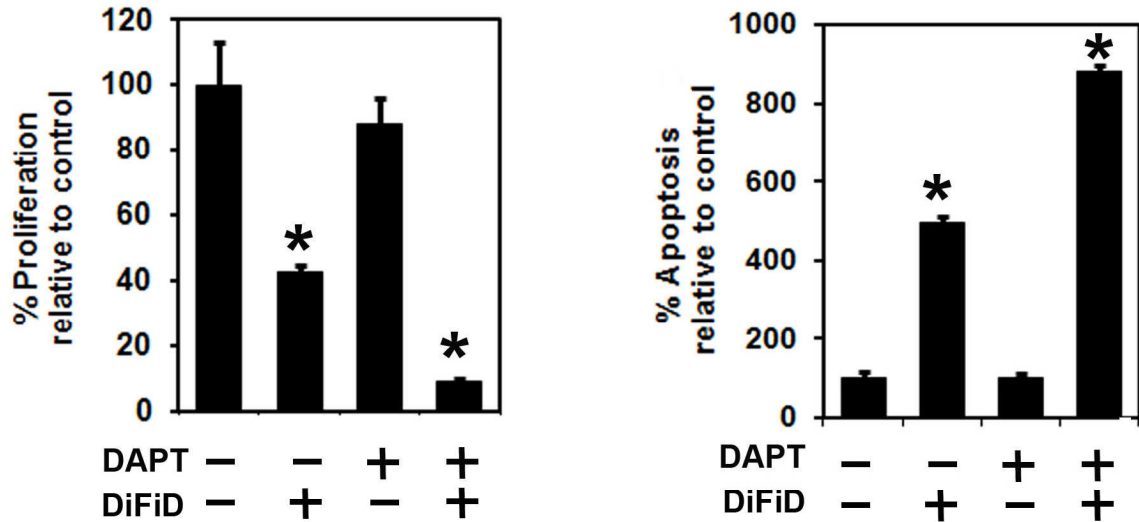

**C**

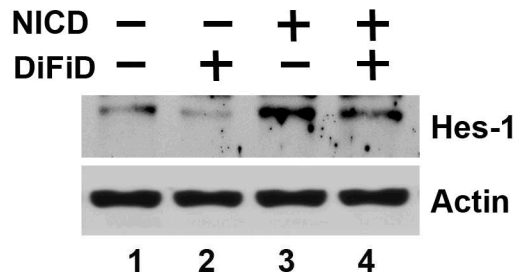

**D**

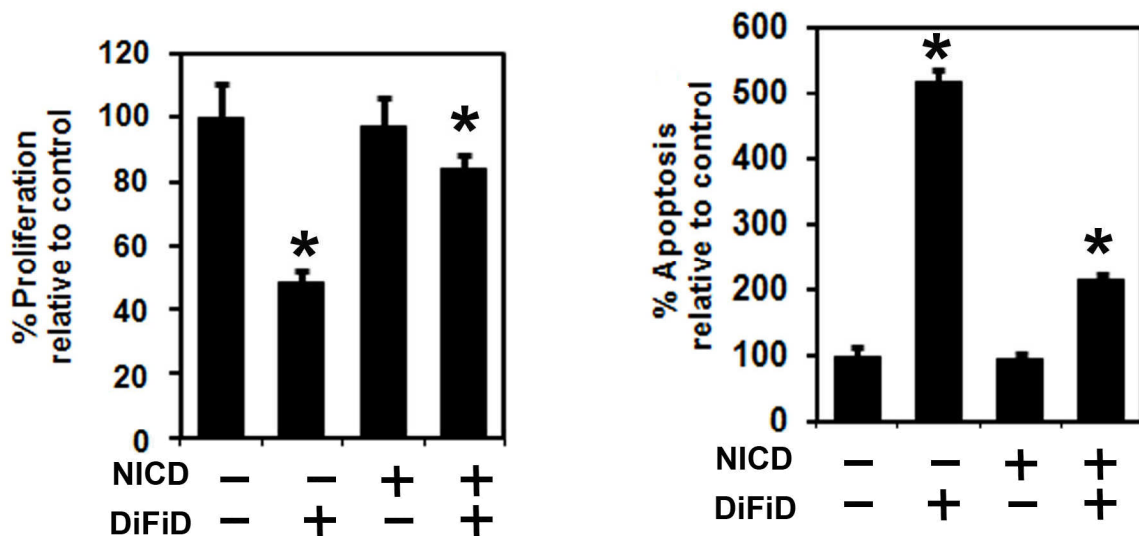

Supplement: NIHMS322237-supplement-2.pdf [file NIHMS322237-supplement-2.pdf]
